# Supplementary material
Source: HighWire-hosted journal article supplement (https://sit.bmj.com/highwire/filestream/357/field_highwire_adjunct_files/5/bmjsit-2020-000071supp006_data_supplement.pdf)

**Figure\_S5\_SupplInfo** : PAE and TURP arm of decision tree in Sensitivity Analysis 3 including expected QALY and cost (in £ per patient)

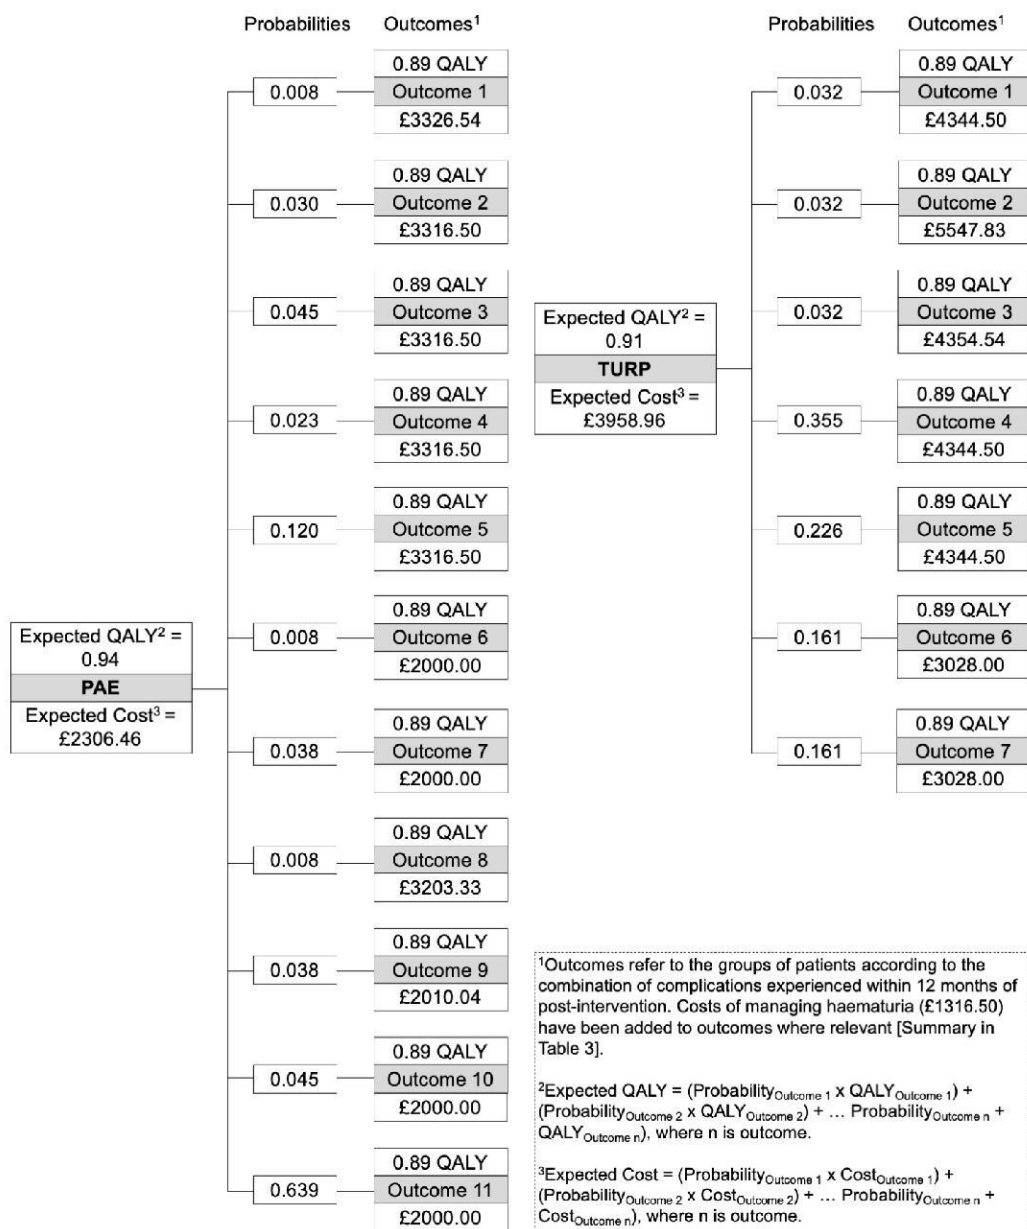

Supplement: bmjsit-2020-000071supp006_data_supplement.pdf [file bmjsit-2020-000071supp006_data_supplement.pdf]
